# Supplementary material
Source: HighWire-hosted journal article supplement (http://www.ajnr.org/highwire/filestream/52297/field_highwire_adjunct_files/0/2800_materials.pdf)
Supplement: 2800_materials.pdf [file 2800_materials.pdf]

**On-Line Table 1: Structural MR imaging findings in autism**

| Author (yr)                           | Patients/Controls (No.)                 | Patient Age (yr)                    | Methods                      | Main Findings                                                                                                                                                                                                                                                                                                                        |
|---------------------------------------|-----------------------------------------|-------------------------------------|------------------------------|--------------------------------------------------------------------------------------------------------------------------------------------------------------------------------------------------------------------------------------------------------------------------------------------------------------------------------------|
| Toal et al 2010 <sup>1</sup>          | 65 (39 ASP, 26 autism)/33 HC            | 31 ± 10                             | VBM<br>GM and WM             | ↓ GM volume of medial temporal, fusiform, and cerebellar regions in ASD,<br>↓ WM volume of brain stem and cerebellar regions in ASD,<br>↑ GM volume in frontal and temporal lobe regions in autism, but not in ASP                                                                                                                   |
| Kwon et al 2004 <sup>2</sup>          | 20 ASD (9 HFA, 11 ASP)/13 HC            | HFA 14 ± 3<br>ASP 14 ± 2            | VBM GM                       | ↓ GM density in ventromedial regions of temporal cortex in ASP and HFA in comparison with HC,<br>↓ GM density in ASP or combined HFA and ASP groups in right inferior temporal gyrus, entorhinal cortex, and rostral fusiform gyrus,<br>↓ GM density in ASP in body of cingulate gyrus in comparison with either the HC or HFA group |
| McAlonan et al 2008 <sup>3</sup>      | 33 ASD (16 ASP, 17 HFA)/55 HC           | HFA 11 ± 2<br>ASP 12 ± 3            | VBM GM                       | ↓ GM volumes in subcortical, posterior cingulate, and precuneus regions in HFA compared with ASP,<br>↓ GM volumes in predominantly frontopallidal regions in HFA compared with HC,<br>↓ GM volume in mainly bilateral caudate and left thalamus in ASP compared with HC                                                              |
| McAlonan et al 2009 <sup>4</sup>      | 36 (18 HFA, 18 ASP)/54 HC               | HFA 139 ± 35<br>ASP 134 ± 30 months | VBM WM                       | ↑ WM volumes around basal ganglia (HFA>ASP)<br>↑ WM volume in left cerebellum in HFA,<br>↓ WM volume in left frontal lobe and corpus callosum in HFA,<br>↓ WM volume in right frontal lobe and corpus callosum in ASP,<br>↑ WM in left parietal lobe in ASP                                                                          |
| Barnea-Goraly et al 2004 <sup>5</sup> | 7 HFA/9 HC                              | 15 ± 3                              | DTI-whole brain              | ↓ FA in many regions including anterior cingulate cortex, ventromedial prefrontal cortex, bilateral temporoparietal junction, bilateral superior temporal sulcus, bilateral temporal lobes approaching amygdala, orbitotemporal tracts, and corpus callosum                                                                          |
| Keller et al 2007 <sup>6</sup>        | 34 HFA/31 HC                            | 19 ± 7                              | DTI-whole brain              | ↓ FA within and near corpus callosum and right retrolenticular portion of internal capsule                                                                                                                                                                                                                                           |
| Brito et al 2009 <sup>7</sup>         | 8 ASD/8 HC                              | 10 ± 1                              | DTI                          | ↓ FA in anterior corpus callosum, right corticospinal tract, posterior limb of internal capsule, left superior cerebellar peduncle, bilateral middle cerebellar peduncle, left putamen                                                                                                                                               |
| Lee et al 2007 <sup>8</sup>           | 43 (38 autism, 5 PDD-NOS)/34 HC         | 16 ± 7                              | DTI                          | ↓ FA in temporal lobe                                                                                                                                                                                                                                                                                                                |
| Cheng et al 2010 <sup>9</sup>         | 25 ASD (11 autism, 12 ASP, 2 PDD)/25 HC | 14 ± 3                              | DTI-whole brain<br>TBSS      | ↓ FA in right posterior limb of internal capsule,<br>↑ FA in frontal lobe, right cingulate gyrus, bilateral insula, right superior temporal gyrus, and bilateral middle cerebellar peduncle; age-related FA gain in HC compared with age-related FA loss in ASD in right paracentral lobule and bilateral superior temporal gyrus    |
| Thakkar et al 2008 <sup>10</sup>      | 12 ASD (8 autism, 2 ASP, 2 PDD)/14 HC   | 30 ± 11                             | DTI<br>TIA fMRI of ACC       | ↓ FA in ACC<br>↓ activation in ACC,<br>both correlating with low scores on cognitive test                                                                                                                                                                                                                                            |
| Sundaram et al 2008 <sup>11</sup>     | 50 ASD (autism, ASP, PDD)/16 HC         | 58 ± 29 months                      | DTI                          | ↓ FA and ↑ ADC (only short fibers, not significant for long fibers) in frontal lobe                                                                                                                                                                                                                                                  |
| Alexander et al 2007 <sup>12</sup>    | 43 ASD/34 HC                            | 16 ± 7                              | DTI-tract                    | ↓ Volume and FA in corpus callosum                                                                                                                                                                                                                                                                                                   |
| Pugliese et al 2009 <sup>13</sup>     | 24 ASP                                  | 23 ± 12                             | DTI-tract                    | No difference in FA and MD in extended limbic pathways, higher number of streamlines (tract volume) in bilateral cingulum and inferior longitudinal fasciculus, lower number of streamlines in right uncinate                                                                                                                        |
| Bloemen et al 2010 <sup>14</sup>      | 13 ASP/13 HC                            | 39 ± 10                             | DTI-whole-brain<br>TBSS      | ↓ FA in internal capsule, frontal, parietal, temporal, and occipital lobes; cingulum; and corpus callosum                                                                                                                                                                                                                            |
| Ben Bashat et al 2007 <sup>15</sup>   | 17 ASD/41 HC                            | 1.8–3.3                             | DTI<br>DWI (high b-value)    | ↑ FA in frontal lobe, mainly in left hemisphere,<br>no changes in occipital lobe                                                                                                                                                                                                                                                     |
| Fletcher et al 2010 <sup>16</sup>     | 10 HFA/10 HC                            | 13 ± 1                              | DTI-tract                    | Loss of left>right asymmetry of FA in arcuate fascicle                                                                                                                                                                                                                                                                               |
| Pardini et al 2009 <sup>17</sup>      | 10 LFA/10 HC                            | 20 ± 3                              | DTI-whole-brain<br>and tract | ↓ FA and tract volumes in orbitofrontal cortex                                                                                                                                                                                                                                                                                       |
| Catani et al 2008 <sup>18</sup>       | 15 ASP/16 HC                            | 31 ± 9                              | DTI-tract                    | ↓ FA in short intracerebellar fibers and right superior cerebellar peduncle, no difference in output tracts                                                                                                                                                                                                                          |

**Note:**—ACC indicates anterior cingulate cortex; ADC, apparent diffusion coefficient; ASD, autism spectrum disorders; ASP, Aasperger syndrome; DTI-tract, DTI tractography; FA, fractional anisotropy; GM, gray matter; HC, healthy control; LFA, low-functioning autism; MD, mean diffusivity; PDD-NOS, pervasive developmental disorder, not otherwise specified; TIA, task-induced activation; TBSS, tract-based spatial statistics; VBM, voxel-based morphometry.

**On-Line Table 2: fMRI findings in autism**

| Author (yr)                                   | Patients/Controls (No.)                | Patient Age (yr) | Methods                                                                                               | Main Findings                                                                                                                                                                                                                          |
|-----------------------------------------------|----------------------------------------|------------------|-------------------------------------------------------------------------------------------------------|----------------------------------------------------------------------------------------------------------------------------------------------------------------------------------------------------------------------------------------|
| Noonan et al 2009 <sup>19</sup>               | 10 HFA/10 HC                           | 23 ± 9           | TIA/conn. from 3 seed regions during source-recognition task                                          | ↑ Conn. in HFA                                                                                                                                                                                                                         |
| Kennedy et al 2006 <sup>20</sup>              | 15 ASD (10 HFA, 3 ASP, 2 NOS), 14 HC   | 25 ± 10          | Deactivation during stroop task                                                                       | Failure of deactivation within DMN                                                                                                                                                                                                     |
| Welchew et al 2005 <sup>21</sup>              | 13 ASP/13 HC                           | 31 ± 9           | TIA conn. during fearful face processing                                                              | ↑ Conn. of amygdala and parahippocampal gyrus                                                                                                                                                                                          |
| Belmonte and Yurgelun-Todd 2003 <sup>22</sup> | 6 ASD                                  | 32 ± 20          | TIA during visual attention task                                                                      | Altered modulation of spatial attention                                                                                                                                                                                                |
| Deeley et al 2007 <sup>23</sup>               | 9 ASP/9 HC                             | 34 ± 10          | TIA during processing of different facial expressions                                                 | ↓ Activation of fusiform and extrastriate cortex in ASP                                                                                                                                                                                |
| Thakkar et al 2008 <sup>10</sup>              | 12 ASD (8 autism, 2 ASP, 2 PDD)/14 HC  | 30 ± 11          | TIA fMRI of ACC DTI                                                                                   | ↑ Activation in ACC,<br>↓ FA in ACC, both correlating with low scores in cognitive test                                                                                                                                                |
| Solomon et al 2009 <sup>24</sup>              | 22 ASD (10 HFA, 12 ASP)/23 HC          | 15 ± 2           | TIA during executive function task                                                                    | ↓ Activation of frontal, parietal, and occipital regions during high-control trials,<br>↓ conn. between left anterior prefrontal cortex and visual areas                                                                               |
| Kennedy and Courchesne 2008 <sup>25</sup>     | 13 ASD (6 HFA, 6 ASP, 1 PDD)/12 HC     | 27               | TIA of DMN components during social and introspective tasks                                           | ↓ Activation of ACC/ventral medial prefrontal cortex                                                                                                                                                                                   |
| Lee et al 2009 <sup>26</sup>                  | 12 ASD/12 HC                           | 10 ± 2           | TIA, conn. of IFC during motor-response-inhibition task                                               | No difference in conn. in either IFC region, just trends                                                                                                                                                                               |
| Lombardo et al 2010 <sup>27</sup>             | 33 ASD/33 HC                           | 27 ± 7           | TIA during self and other representation tasks                                                        | ↓ VMPFC discrimination, equal activation to self, and other mentalizing (HC SM>OM) = lack of neural self-reference effect in VMPFC                                                                                                     |
| Cherkassky et al 2006 <sup>28</sup>           | 57 HFA/57 HC                           | 24 ± 11          | rsfMRI (between different task conditions) seed-based conn. among 12 ROIs                             | ↓ Conn. between most of described ROI (despite similar levels of activation)                                                                                                                                                           |
| Kennedy and Courchesne 2008 <sup>29</sup>     | 13 ASD (6 HFA, 6 ASP, 1 PDD)/12 HC     | 27               | rsfMRI seed-based conn., 3 task-positive seeds, 3 task-negative seeds (MPFC, PCC, left angular gyrus) | ↓ Conn. of TNN components, intact conn. of TP seeds                                                                                                                                                                                    |
| Weng et al 2009 <sup>30</sup>                 | 16 ASD (6 HFA, 2 ASP, 8 PDD-NOS)/17 HC | 15 ± 1           | rsfMRI seed-based conn. between PCC and other regions of DMN                                          | ↓ Conn. in 9/11 regions of DMN, correlated with poorer social skills and repetitive behavior<br>↑ Conn. in other DMN-regions correlated with poorer verbal or nonverbal communication                                                  |
| Monk et al 2009 <sup>31</sup>                 | 12 ASD (7 A, 2 ASP, 3 PDD)             | 26 ± 6           | rsfMRI seed-based conn. origination from PCC                                                          | ↓ Conn. between PCC superior frontal gyrus (correlated with poorer social functioning)<br>↑ Conn. between PCC and right temporal lobe and right parahippocampal gyrus (latter correlated with more restricted and repetitive behavior) |
| Paakki et al 2010 <sup>32</sup>               | 28 ASD/27 HC                           | 8                | rsfMRI                                                                                                | Right dominant alterations of regional homogeneity in rs brain activity in ASD                                                                                                                                                         |

**Note:**—ACC indicates anterior cingulate cortex; ASD, autism spectrum disorder; ASP, Asperger syndrome; Conn., connectivity; DMN, default mode network; HC, healthy control; HFA, high functioning autism; IFC, inferior frontal cortex; MPFC, medial prefrontal cortex; OM, other mentalizing; NOS, not otherwise specified; PCC, posterior cingulate cortex; PDD-NOS, pervasive developmental disorder not otherwise specified; rs, resting state; rsfMRI, resting state functional MR imaging; SM, self mentalizing; TIA, task-induced activation; TNN, task-negative network; TP, task-positive; VMPFC, ventromedial prefrontal cortex.

## On-Line References

1. Toal F, Daly EM, Page L, et al. **Clinical and anatomic heterogeneity in autistic spectrum disorder: a structural MRI study.** *Psychol Med* 2010;40:1171–81. Epub 2009 Nov 6
2. Kwon H, Ow AW, Pedatella KE, et al. **Voxel-based morphometry elucidates structural neuroanatomy of high-functioning autism and Asperger syndrome.** *Dev Med Child Neurol* 2004;46:760–64
3. McAlonan GM, Suckling J, Wong N, et al. **Distinct patterns of grey matter abnormality in high-functioning autism and Asperger's syndrome.** *J Child Psychol Psychiatry* 2008;49:1287–95
4. McAlonan GM, Cheung C, Cheung V, et al. **Differential effects on white-matter systems in high-functioning autism and Asperger's syndrome.** *Psychol Med* 2009;39:1885–93
5. Barnea-Goraly N, Kwon H, Menon V, et al. **White matter structure in autism: preliminary evidence from diffusion tensor imaging.** *Biol Psychiatry* 2004;55:323–26
6. Keller TA, Kana RK, Just MA. **A developmental study of the structural integrity of white matter in autism.** *Neuroreport* 2007;18:23–27
7. Brito AR, Vasconcelos MM, Domingues RC, et al. **Diffusion tensor imaging findings in school-aged autistic children.** *J Neuroimaging* 2009;19:337–43
8. Lee JE, Bigler ED, Alexander AL, et al. **Diffusion tensor imaging of white matter in the superior temporal gyrus and temporal stem in autism.** *Neurosci Lett* 2007;424:127–32
9. Cheng Y, Chou K-H, Chen IY, et al. **Atypical development of white matter microstructure in adolescents with autism spectrum disorders.** *Neuroimage* 2010;50:873–82
10. Thakkar KN, Polli FE, Joseph RM, et al. **Response monitoring, repetitive behaviour and anterior cingulate abnormalities in autism spectrum disorders (ASD).** *Brain* 2008;131(pt 9):464–78. Epub 2008 Jun 11
11. Sundaram SK, Kumar A, Makki MI, et al. **Diffusion tensor imaging of frontal lobe in autism spectrum disorder.** *Cereb Cortex* 2008;18:2659–65
12. Alexander AL, Lee JE, Lazar M, et al. **Diffusion tensor imaging of the corpus callosum in autism.** *Neuroimage* 2007;34:61–73
13. Pugliese L, Catani M, Arneis S, et al. **The anatomy of extended limbic pathways in Asperger syndrome: a preliminary diffusion tensor imaging tractography study.** *Neuroimage* 2009;47:427–34
14. Bloemen OJ, Deeley Q, Sundram F, et al. **White matter integrity in Asperger syndrome: a preliminary diffusion tensor magnetic resonance imaging study in adults.** *Autism Res* 2010;3:203–13
15. Ben Bashat D, Kronfeld-Duenias V, Zachor DA, et al. **Accelerated maturation of white matter in young children with autism: a high b value DWI study.** *Neuroimage* 2007;37:40–47
16. Fletcher PT, Whitaker RT, Tao R, et al. **Microstructural connectivity of the arcuate fasciculus in adolescents with high-functioning autism.** *Neuroimage* 2010;51:1117–1125
17. Pardini M, Garaci FG, Bonzano L, et al. **White matter reduced streamline coherence in young men with autism and mental retardation.** *Eur J Neurol* 2009;16:1185–90
18. Catani M, Jones DK, Daly E, et al. **Altered cerebellar feedback projections in Asperger syndrome.** *Neuroimage* 2008;41:1184–91
19. Noonan SK, Haist F, Müller R-A. **Aberrant functional connectivity in autism: evidence from low-frequency BOLD signal fluctuations.** *Brain Res* 2009;1262:48–63
20. Kennedy DP, Redcay E, Courchesne E. **Failing to deactivate: resting functional abnormalities in autism.** *Proc Natl Acad Sci U S A* 2006;103:8275–80. Epub 2006 May 15
21. Welchew DE, Ashwin C, Berkouk K, et al. **Functional disconnectivity of the medial temporal lobe in Asperger's syndrome.** *Biol Psychiatry* 2005;57:991–98
22. Belmonte MK, Yurgelun-Todd DA. **Functional anatomy of impaired selective attention and compensatory processing in autism.** *Brain Res Cogn Brain Res* 2003;17:651–64
23. Deeley Q, Daly EM, Surguladze S, et al. **An event related functional magnetic resonance imaging study of facial emotion processing in Asperger syndrome.** *Biol Psychiatry* 2007;62:207–17
24. Solomon M, Ozonoff SJ, Ursu S, et al. **The neural substrates of cognitive control deficits in autism spectrum disorders.** *Neuropsychologia* 2009;47:2515–26
25. Kennedy DP, Courchesne E. **Functional abnormalities of the default network during self- and other-reflection in autism.** *Soc Cogn Affect Neurosci* 2008;3:177–90
26. Lee PS, Yerys BE, Della Rosa A, et al. **Functional connectivity of the inferior frontal cortex changes with age in children with autism spectrum disorders: a fMRI study of response inhibition.** *Cereb Cortex* 2009;19:1787–94. Epub 2008 Dec 9
27. Lombardo MV, Chakrabarti B, Bullmore ET, et al. **Atypical neural self-representation in autism.** *Brain* 2010;133:611–24
28. Cherkassky VL, Kana RK, Keller TA, et al. **Functional connectivity in a baseline resting-state network in autism.** *Neuroreport* 2006;17:1687–90
29. Kennedy DP, Courchesne E. **The intrinsic functional organization of the brain is altered in autism.** *Neuroimage* 2008;39:1877–85
30. Weng SJ, Wiggins JL, Peltier SJ, et al. **Alterations of resting state functional connectivity in the default network in adolescents with autism spectrum disorders.** *Brain Res* 2009;1313:202–14
31. Monk CS, Peltier SJ, Wiggins JL, et al. **Abnormalities of intrinsic functional connectivity in autism spectrum disorders.** *Neuroimage* 2009;47:764–72
32. Paakki JJ, Rahko J, Long XY, et al. **Alterations in regional homogeneity of resting-state brain activity in autism spectrum disorders.** *Brain Res* 2010;1321:169–179
